# Supplementary figures and images for: A randomised controlled trial of tiotropium in adolescents with severe symptomatic asthma
Source: PubMed Central journal article supplement — Eur Respir J. 2017 Jan 12;49(1):1601100. doi: 10.1183/13993003.01100-2016 (PMC5298196; doi:10.1183/13993003.01100-2016), 2017-01-12

Figure S1

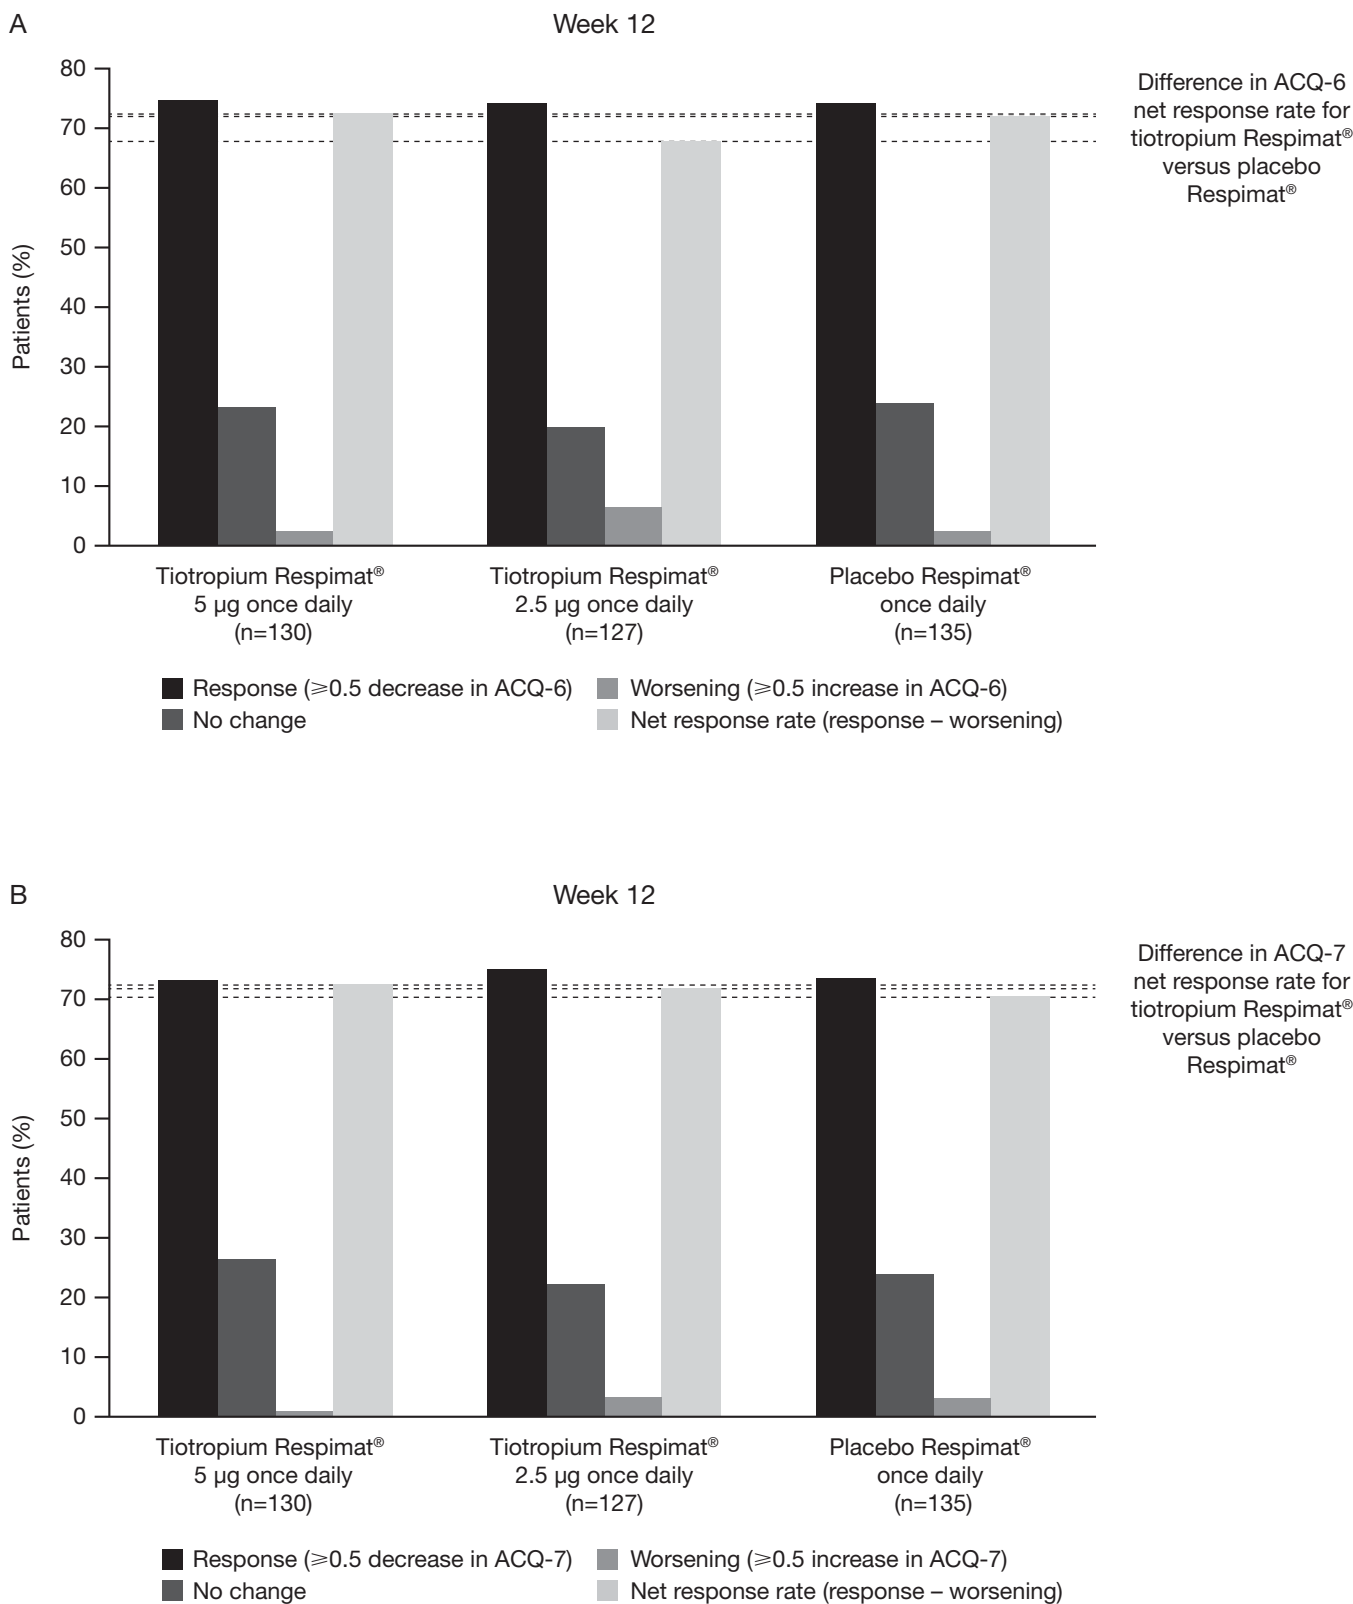

Supplement: ERJ-01100-2016_Figure_S1.pdf [file ERJ-01100-2016_Figure_S1.pdf]
